# Supplementary material
Source: PubMed Central journal article supplement (PMC9824931)

## Supplementary material

**Figure S1.**

Hypothetical likelihood distributions for LST decisions with regard to a patient characteristic with 8 distinct categories. The three examples depict simulated distributions with decreasing values for the entropy  $H(X)$  which suggest an increasing contribution of that patient characteristic to these decisions. The more extensive preferences for selected categories are during decision-making, the smaller is  $H(X)$ .

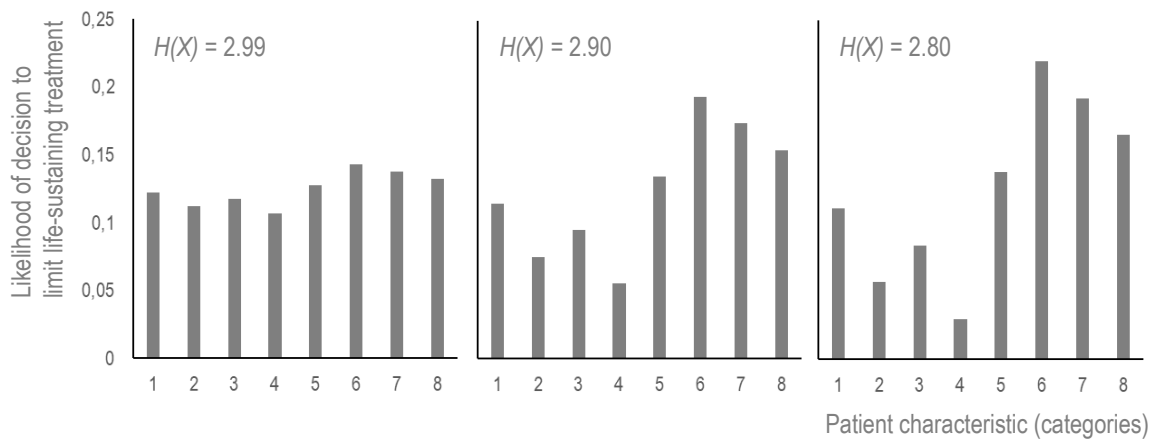

Supplement: 12911_2022_2094_MOESM1_ESM.pdf [file 12911_2022_2094_MOESM1_ESM.pdf]
